# Supplementary material for: Differential IL18 signaling via IL18 receptor and Na-Cl co-transporter discriminating thermogenesis and glucose metabolism regulation
Source: PubMed Central journal article supplement (PMC9732325; doi:10.1038/s41467-022-35256-8), 2022-12-08
Supplement: 41467_2022_35256_MOESM1_ESM.pdf [file 41467_2022_35256_MOESM1_ESM.pdf]

## Supplementary Materials

### **Differential IL18 signaling *via* IL18 receptor and Na-Cl co-transporter discriminating thermogenesis and glucose metabolism regulation**

Xian Zhang,<sup>1,2</sup> Songyuan Luo,<sup>2,3</sup> Minjie Wang,<sup>2</sup> Qiongqiong Cao,<sup>1</sup> Zhixin Zhang,<sup>1</sup> Qin Huang,<sup>2</sup> Jie Li,<sup>2</sup> Zhiyong Deng,<sup>2</sup> Tianxiao Liu,<sup>2</sup> Cong-Lin Liu,<sup>2,4</sup> Mathilde Meppen,<sup>2</sup> Amelie Vromman,<sup>2</sup> Richard A. Flavell,<sup>5</sup> Gökhan S. Hotamışlıgil,<sup>6</sup> Jian Liu,<sup>1</sup> Peter Libby,<sup>2</sup> Zhangsuo Liu,<sup>4</sup> Guo-Ping Shi<sup>2</sup>

- 1) School of Food and Biological Engineering, Hefei University of Technology, Hefei, Anhui 230009, China
- 2) Department of Medicine, Brigham and Women's Hospital and Harvard Medical School, Boston, MA 02115, USA
- 3) Department of Cardiology, Guangdong Cardiovascular Institute, Guangdong Provincial People's Hospital, Guangdong Academy of Medical Sciences, Guangzhou, Guangdong 510000, China
- 4) Department of Nephrology, the First Affiliated Hospital, Research Institute of Nephrology, Zhengzhou University, Henan Province Research Center For Kidney Disease, Key Laboratory of Precision Diagnosis and Treatment for Chronic Kidney Disease in Henan Province, Zhengzhou, Henan 450052, China
- 5) Department of Immunobiology, Yale School of Medicine, New Haven, CT 06520, USA
- 6) Department of Molecular Metabolism, Harvard School of Public Health, Boston, MA 02115, USA

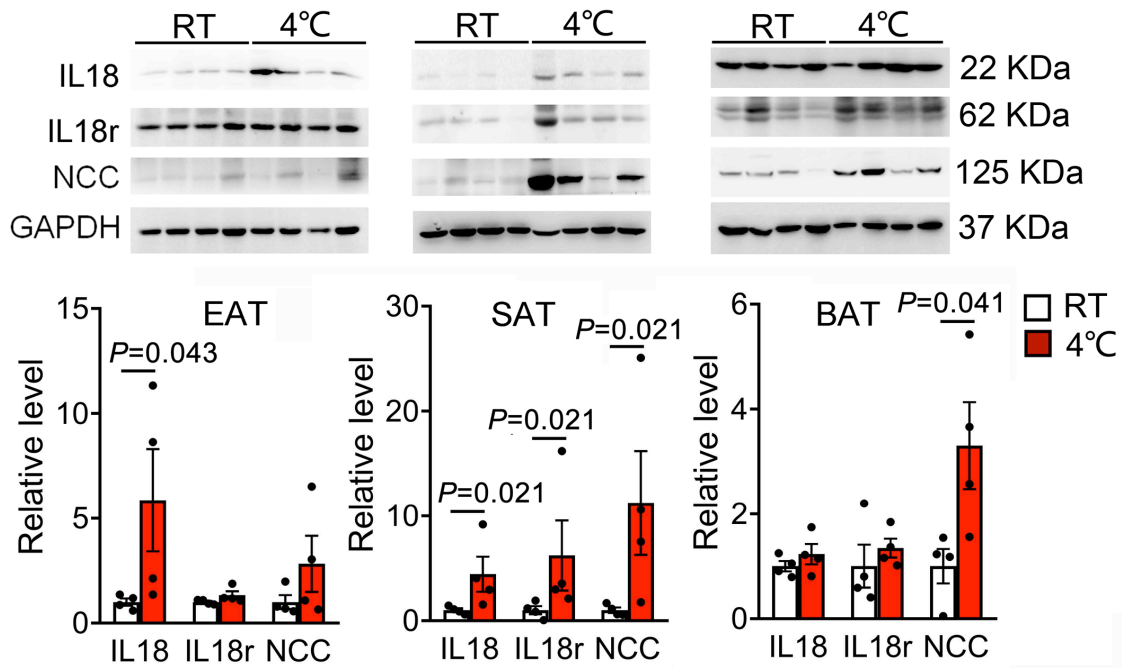

**Supplementary Fig. 1.** Adipose tissue expressions of IL18, IL18r, and NCC in EAT, SAT, and BAT from WT mice in response to thermogenic activation at room temperature (RT) or 4 °C for 7 days on a LFD (n=4 biologically independent samples per group). Data are mean±SEM, two-sided Mann-Whitney *U* test.



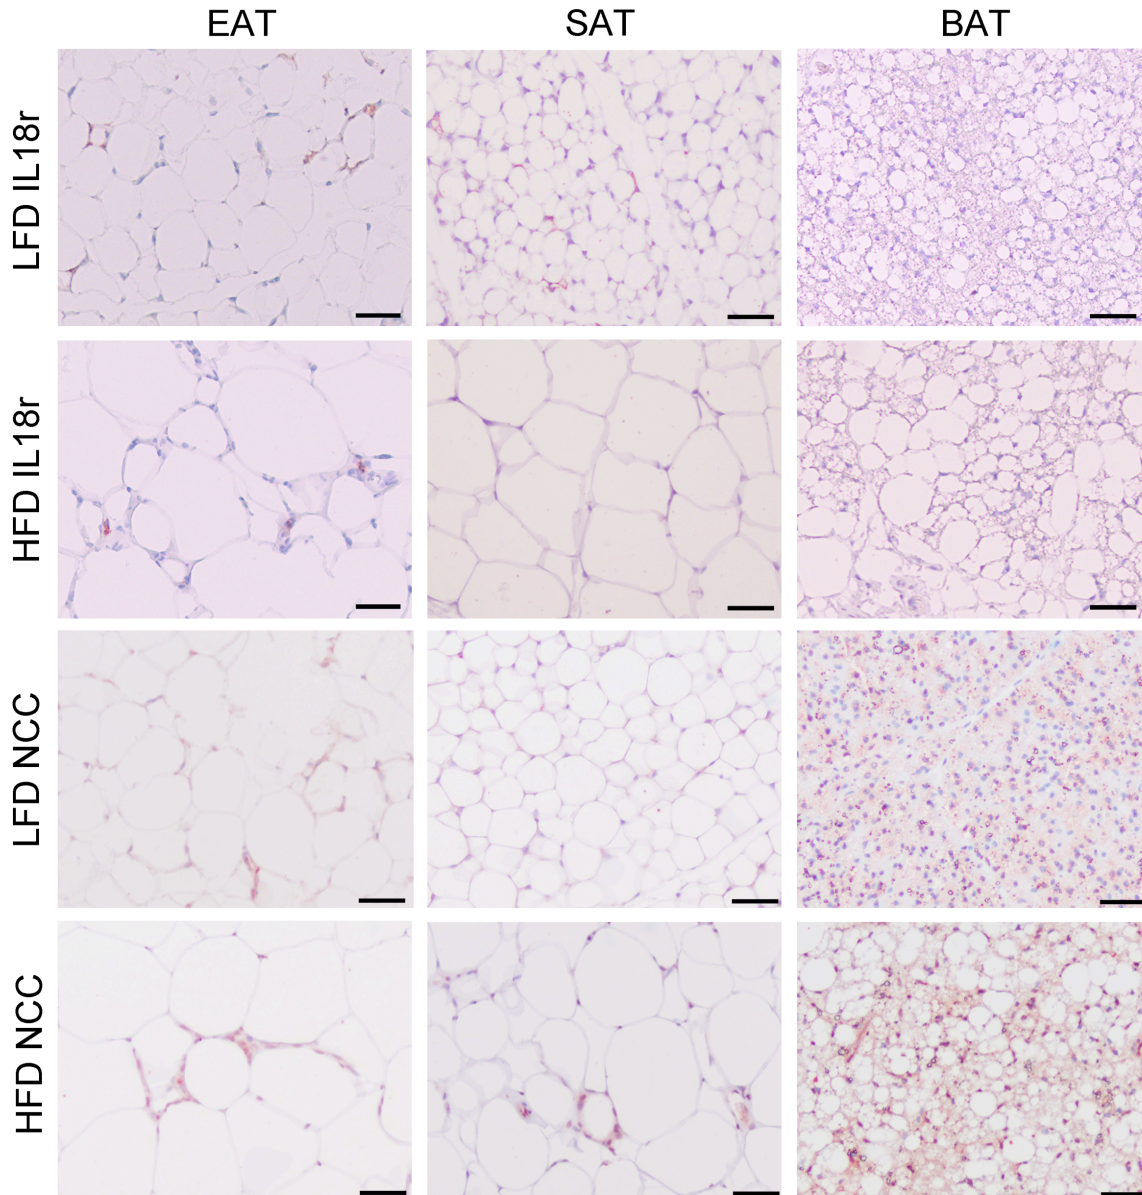

**Supplementary Fig. 2.** IL18r and NCC expression in different types of adipose tissues. Representative immunostaining of NCC and IL18r in EAT, SAT and BAT sections from WT mice on a LFD or HFD (n=8 biologically independent samples per group). Scale: 50  $\mu$ m.

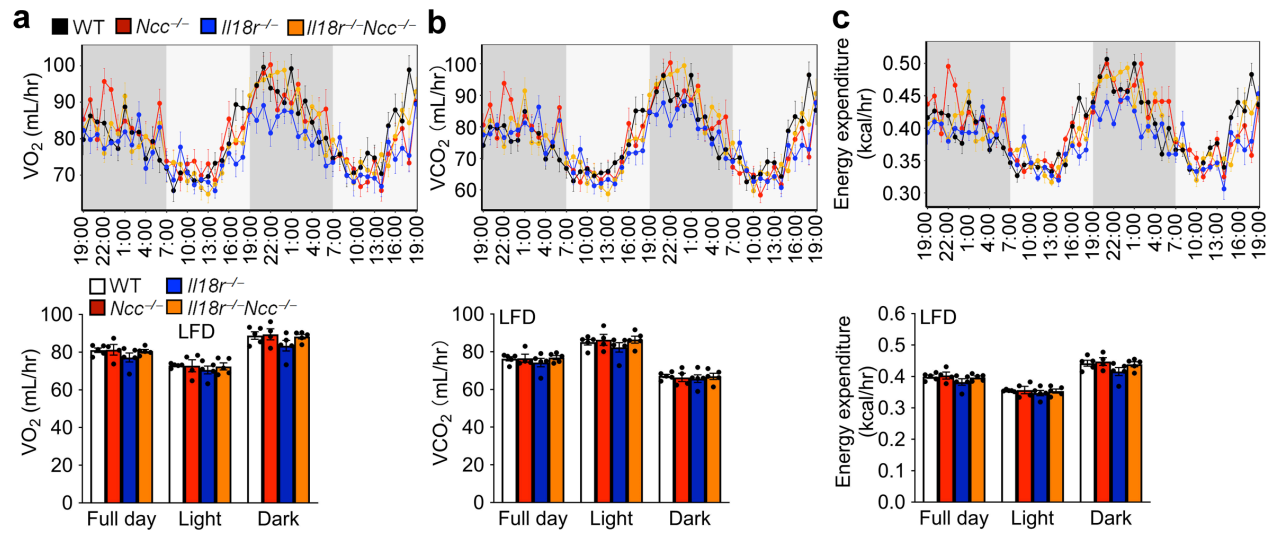

**Supplementary Fig. 3.** Energy expenditure in LFD-fed mice without CL316243 treatment. **a-c.** Mouse metabolic parameters, including oxygen consumption (VO<sub>2</sub>) (**a**), carbon dioxide production (VCO<sub>2</sub>) (**b**), and energy expenditure (**c**) and their average values from full day cycle, light cycle, and dark cycle during 48 hrs of monitoring in LFD-fed WT, *Ncc*<sup>-/-</sup>, *Il18r*<sup>-/-</sup>, and *Il18r*<sup>-/-</sup>*Ncc*<sup>-/-</sup> mice (WT: n=5; *Ncc*<sup>-/-</sup>: n=4, *Il18r*<sup>-/-</sup>: n=5; *Il18r*<sup>-/-</sup>*Ncc*<sup>-/-</sup>: n=5 biologically independent animals). Data are mean±SEM. One-way ANOVA test, followed by LSD post-test.

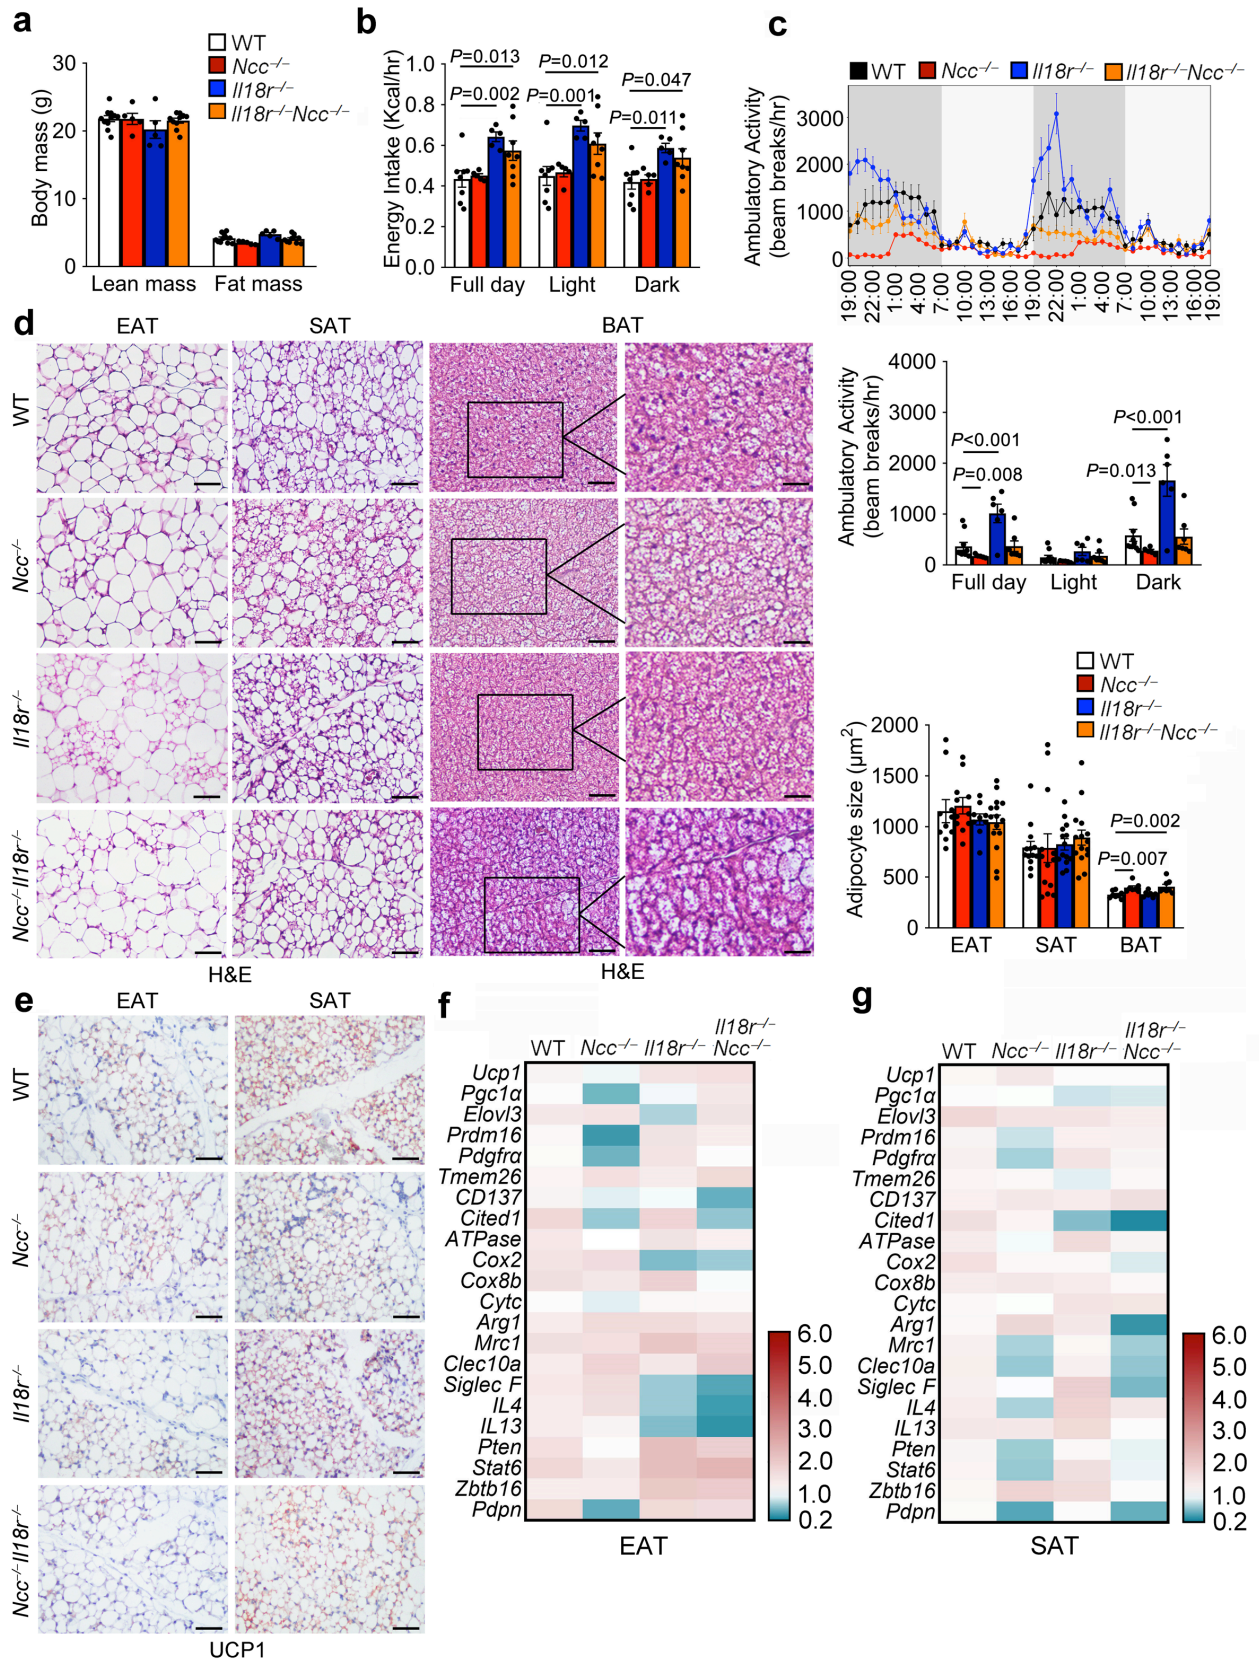



**Supplementary Fig. 4.** Bodyweight, adipocyte morphology, and gene expressions in WT, *Ncc<sup>-/-</sup>*, *Il18r<sup>-/-</sup>* and *Il18r<sup>-/-</sup>Ncc<sup>-/-</sup>* mice in response to CL316243. **a-c.** Body mass (WT: n=11; *Ncc<sup>-/-</sup>*: n=5, *Il18r<sup>-/-</sup>*: n=5; *Il18r<sup>-/-</sup>Ncc<sup>-/-</sup>*: n=10 biologically independent animals) (**a**), food intake during the day-night cycles (WT: n=8; *Ncc<sup>-/-</sup>*: n=5, *Il18r<sup>-/-</sup>*: n=5; *Il18r<sup>-/-</sup>Ncc<sup>-/-</sup>*: n=8 biologically independent animals) (**b**), and ambulatory activity and their average values (WT: n=10; *Ncc<sup>-/-</sup>*: n=5, *Il18r<sup>-/-</sup>*: n=6; *Il18r<sup>-/-</sup>Ncc<sup>-/-</sup>*: n=7 biologically independent animals) (**c**). **d.** Representative images of H&E staining and quantification of adipocyte sizes in EAT, SAT, and BAT (WT-EAT: n=10; *Ncc<sup>-/-</sup>*-EAT: n=11, *Il18r<sup>-/-</sup>*-EAT: n=9; *Il18r<sup>-/-</sup>Ncc<sup>-/-</sup>*-EAT: n=15; WT-SAT: n=13; *Ncc<sup>-/-</sup>*-SAT: n=13, *Il18r<sup>-/-</sup>*-SAT: n=14; *Il18r<sup>-/-</sup>Ncc<sup>-/-</sup>*-SAT: n=15; WT-BAT: n=8; *Ncc<sup>-/-</sup>*-BAT: n=7, *Il18r<sup>-/-</sup>*-BAT: n=7; *Il18r<sup>-/-</sup>Ncc<sup>-/-</sup>*-BAT: n=8 biologically independent samples). **e.** Representative images of UCP1 immunostaining (n=7~10/group) of EAT and SAT. Scale: 50  $\mu$ m, inset: 25  $\mu$ m. **f-g.** RT-PCR analysis of thermogenic, mitochondrial, lipogenic, and lipolytic genes, and M2 macrophage markers, eosinophil marker, type 2 cytokines, and Treg functional molecules in EAT (WT: n=7; *Ncc<sup>-/-</sup>*: n=6, *Il18r<sup>-/-</sup>*: n=7; *Il18r<sup>-/-</sup>Ncc<sup>-/-</sup>*: n=8 biologically independent samples) (**f**) and SAT (WT: n=7; *Ncc<sup>-/-</sup>*: n=6, *Il18r<sup>-/-</sup>*: n=7; *Il18r<sup>-/-</sup>Ncc<sup>-/-</sup>*: n=9 biologically independent samples) (**g**). Data are mean $\pm$ SEM, one-way ANOVA test, followed by LSD post-test.

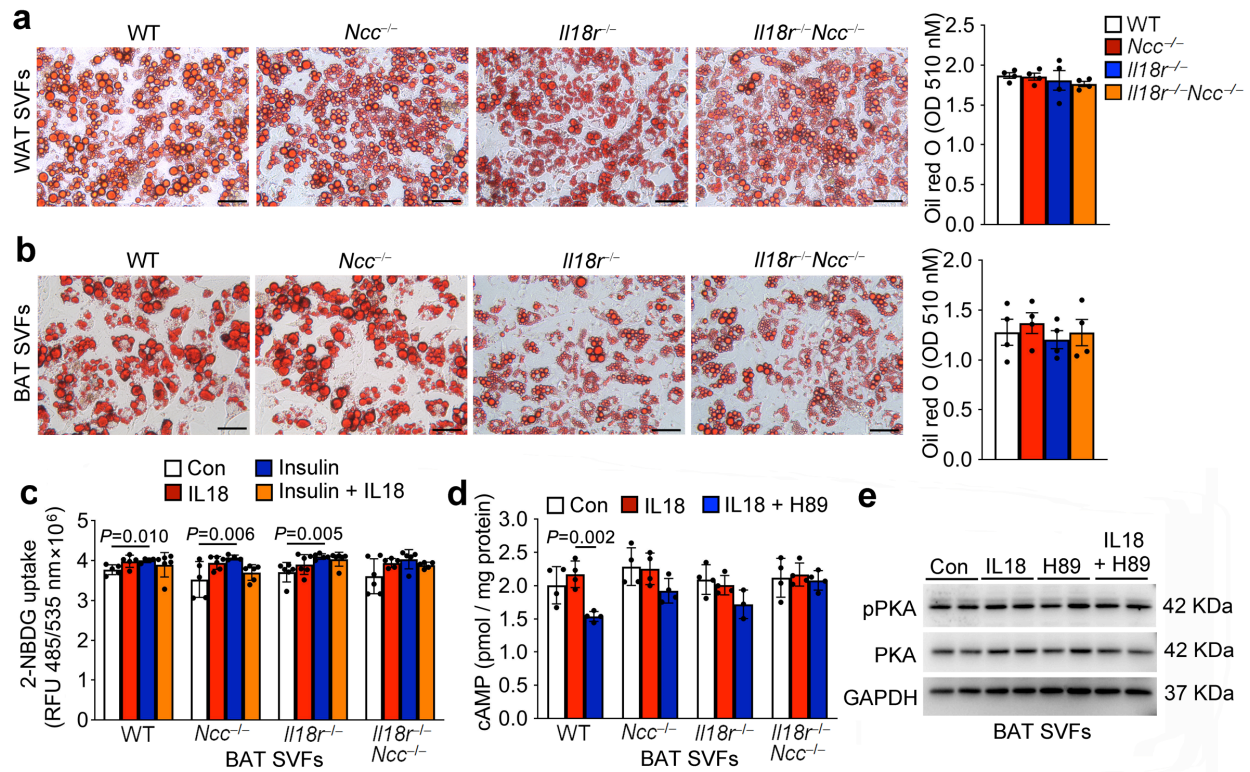

**Supplementary Fig. 5.** Pre-adipocyte adipogenesis and adipocyte glucose uptake and cAMP signaling from WT, *Ncc*<sup>-/-</sup>, *Il18r*<sup>-/-</sup> and *Il18r*<sup>-/-</sup>*Ncc*<sup>-/-</sup> mice. **a/b.** Oil-red O staining and quantification of lipid accumulation (OD 510 nm) in differentiated white adipocytes (**a**) and differentiated brown adipocytes (**b**), scale: 50  $\mu$ m (n=4 biologically independent samples per group). **c.** Glucose (2-NBDG) uptake in differentiated brown adipocytes from different mice with or without 20 nM insulin and 0 or 100 ng/mL of IL18 treatment for 24 hrs as indicated (WT: n=6; *Ncc*<sup>-/-</sup>: n=6, *Il18r*<sup>-/-</sup>: n=5; *Il18r*<sup>-/-</sup>*Ncc*<sup>-/-</sup>: n=6 biologically independent samples). **d-e.** cAMP levels (WT: n=4; *Ncc*<sup>-/-</sup>: n=4, *Il18r*<sup>-/-</sup>: n=4; *Il18r*<sup>-/-</sup>*Ncc*<sup>-/-</sup>: n=3 biologically independent samples) (**d**) and immunoblot and quantification of pPKA to total PKA (**e**) in differentiated brown adipocytes from different mice with or without 100 ng/mL of IL18, 20 nM insulin, or 20  $\mu$ M H89. Data are mean $\pm$ SEM, one-way ANOVA test, followed by LSD post-test.

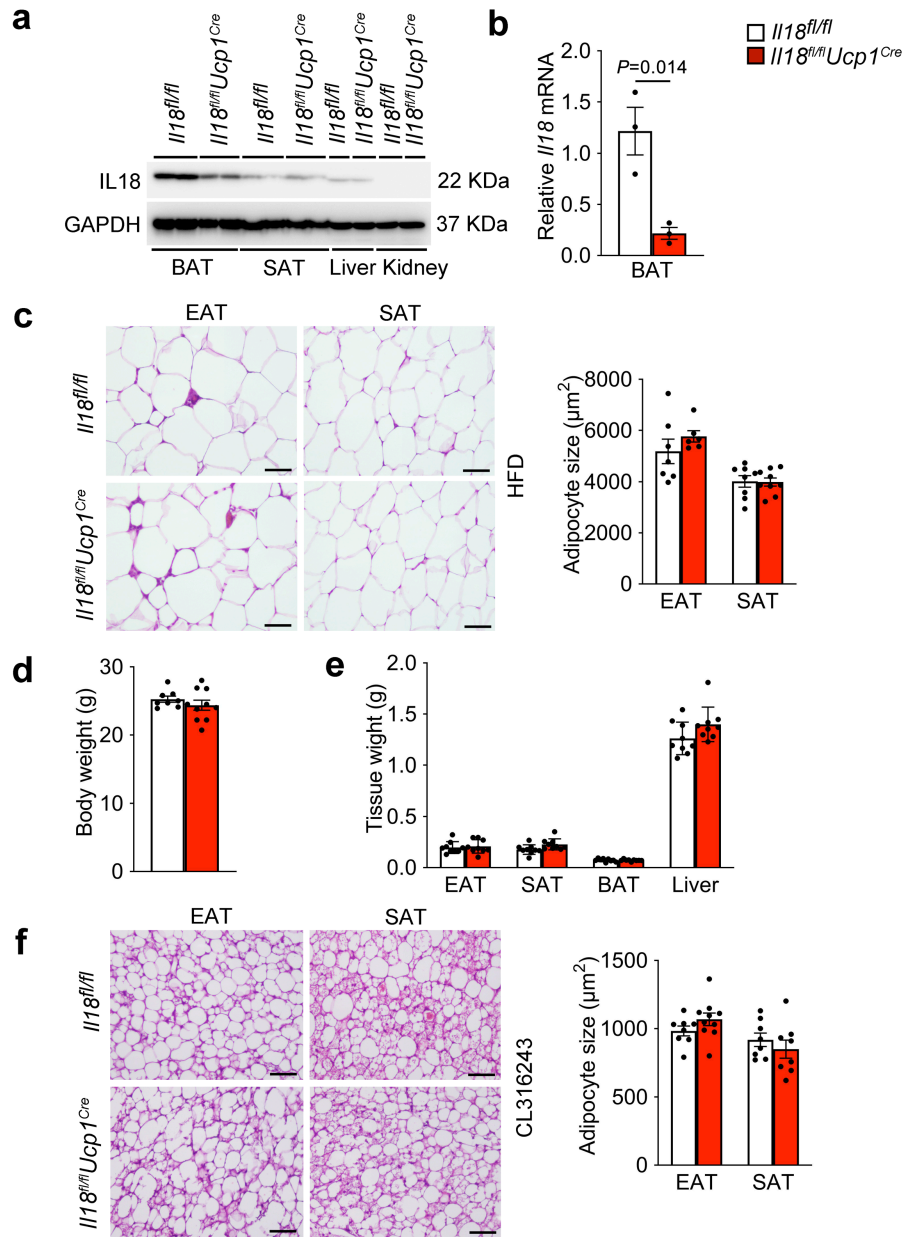

**Supplementary Fig. 6.** IL18 expression, adipocyte morphology, and body and tissue weights in *Il18<sup>fl/fl</sup>* and *Il18<sup>fl/fl</sup>Ucp1<sup>Cre</sup>* mice. **a.** Immunoblot analysis of IL18 expression in different tissues from LFD-fed *Il18<sup>fl/fl</sup>* and *Il18<sup>fl/fl</sup>Ucp1<sup>Cre</sup>* mice. Representative of 3 independent experiments. **b.** RT-PCR analysis of *Il18* in BAT from LFD-fed *Il18<sup>fl/fl</sup>* and *Il18<sup>fl/fl</sup>Ucp1<sup>Cre</sup>* mice (n=3 biologically independent samples per group). **c.** Representative images of H&E staining of EAT and SAT from mice fed a HFD for 12 weeks (*Il18<sup>fl/fl</sup>*-EAT: n=7; *Il18<sup>fl/fl</sup>Ucp1<sup>Cre</sup>*-EAT: n=6; *Il18<sup>fl/fl</sup>*-EAT: n=8; *Il18<sup>fl/fl</sup>Ucp1<sup>Cre</sup>*-EAT: n=9 biologically independent samples). Scale: 50  $\mu\text{m}$ . Bodyweight (**d**), tissue weight (**e**), and representative H&E staining of EAT and SAT (**f**) from mice after 7 days of CL316243 treatment (n=9 biologically independent samples per group). Scale: 50  $\mu\text{m}$ . Data are mean $\pm$ SEM, two-sided Student's t-test.

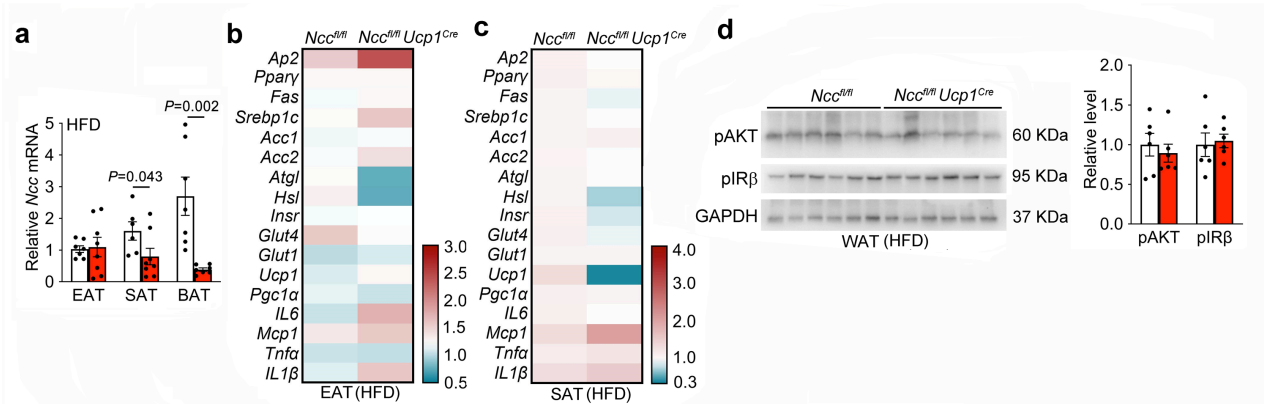

**Supplementary Fig. 7.** NCC and metabolic gene expression and insulin signaling in *Ncc<sup>fl/fl</sup>* and *Ncc<sup>fl/fl</sup>Ucp1<sup>Cre</sup>* mice after 12 weeks of a HFD. **a.** RT-PCR analysis of NCC expression in EAT, SAT, and BAT from *Ncc<sup>fl/fl</sup>* and *Ncc<sup>fl/fl</sup>Ucp1<sup>Cre</sup>* mice (n=6 biologically independent samples per group). **b-c.** RT-PCR analysis of lipogenic, lipolytic, glucose metabolic, thermogenic, and inflammatory genes in EAT (**b**) and SAT (**c**) from indicated mice (*Ncc<sup>fl/fl</sup>*: n=12; *Ncc<sup>fl/fl</sup>Ucp1<sup>Cre</sup>*: n=9 biologically independent samples). **d.** Immunoblots analysis of pAKT, pIRβ and GAPDH in WAT from HFD-fed *Ncc<sup>fl/fl</sup>* and *Ncc<sup>fl/fl</sup>Ucp1<sup>Cre</sup>* mice (n=6 biologically independent samples per group). Data are mean±SEM, two-sided Mann-Whitney *U* test.

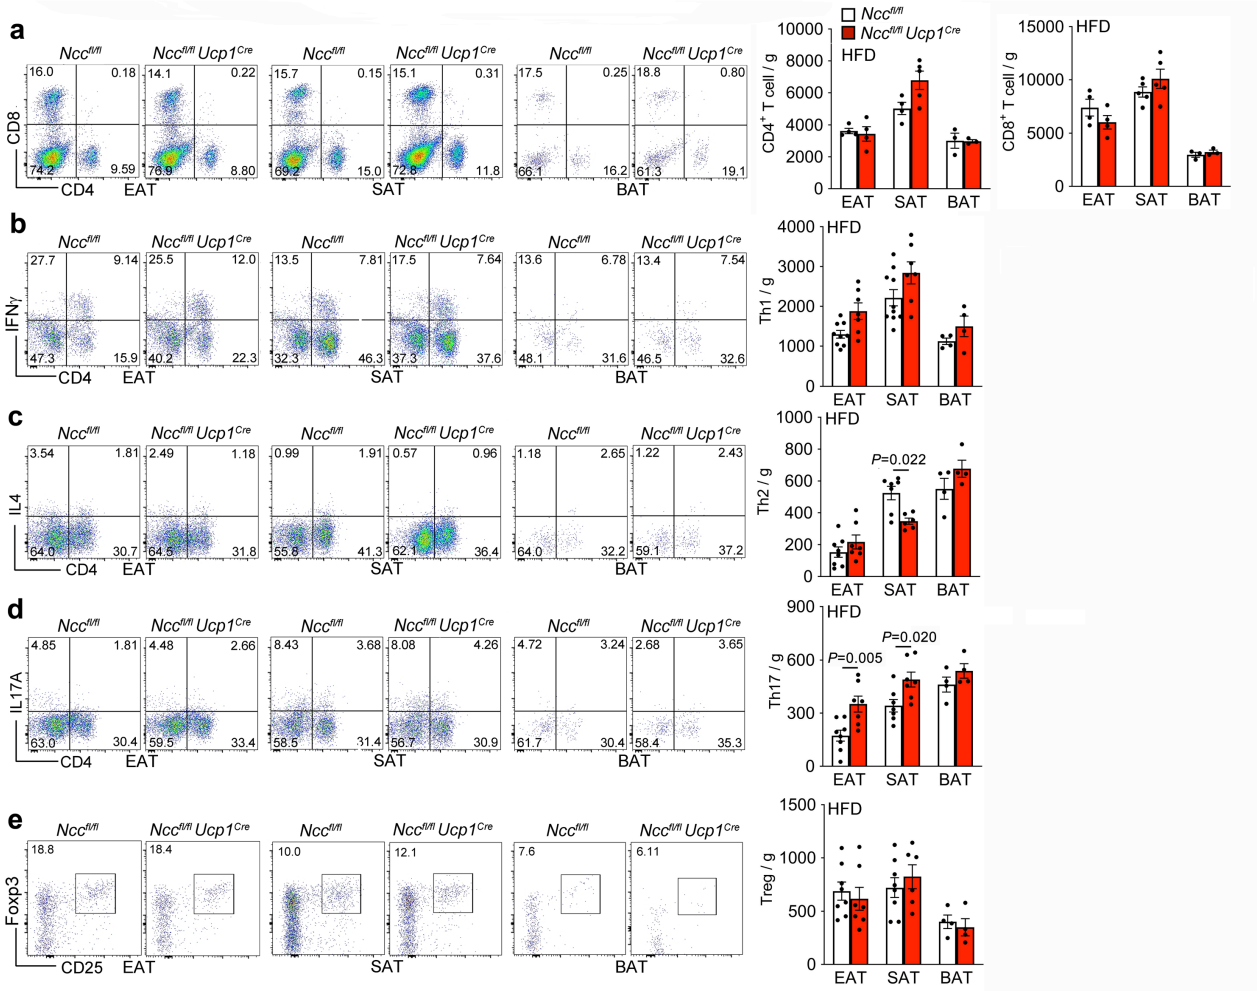

**Supplementary Fig. 8.** Quantification of different T cells in EAT, SAT, and BAT from *Ncc<sup>fl/fl</sup>* and *Ncc<sup>fl/fl</sup> Ucp1<sup>Cre</sup>* mice after 12 weeks of a HFD. **a-e.** Representative FACS images and quantification of total CD4<sup>+</sup> and CD8<sup>+</sup> T cells (n=4 biologically independent samples per group in EAT and SAT, n=3 biologically independent samples per group in BAT) (**a**) and CD4<sup>+</sup>IFN $\gamma$ <sup>+</sup> Th1, CD4<sup>+</sup>IL4<sup>+</sup> Th2, CD4<sup>+</sup>IL17A<sup>+</sup> Th17 (**b-d**), and CD4<sup>+</sup>CD25<sup>+</sup>Foxp3<sup>+</sup> Treg (n=7 biologically independent samples per group in EAT and SAT, n=4 biologically independent samples per group in BAT) (**e**) cells in EAT, SAT, and BAT from indicated mice. Data are mean $\pm$ SEM, \**P*<0.05, \*\**P*<0.01, two-sided Student's t-test.



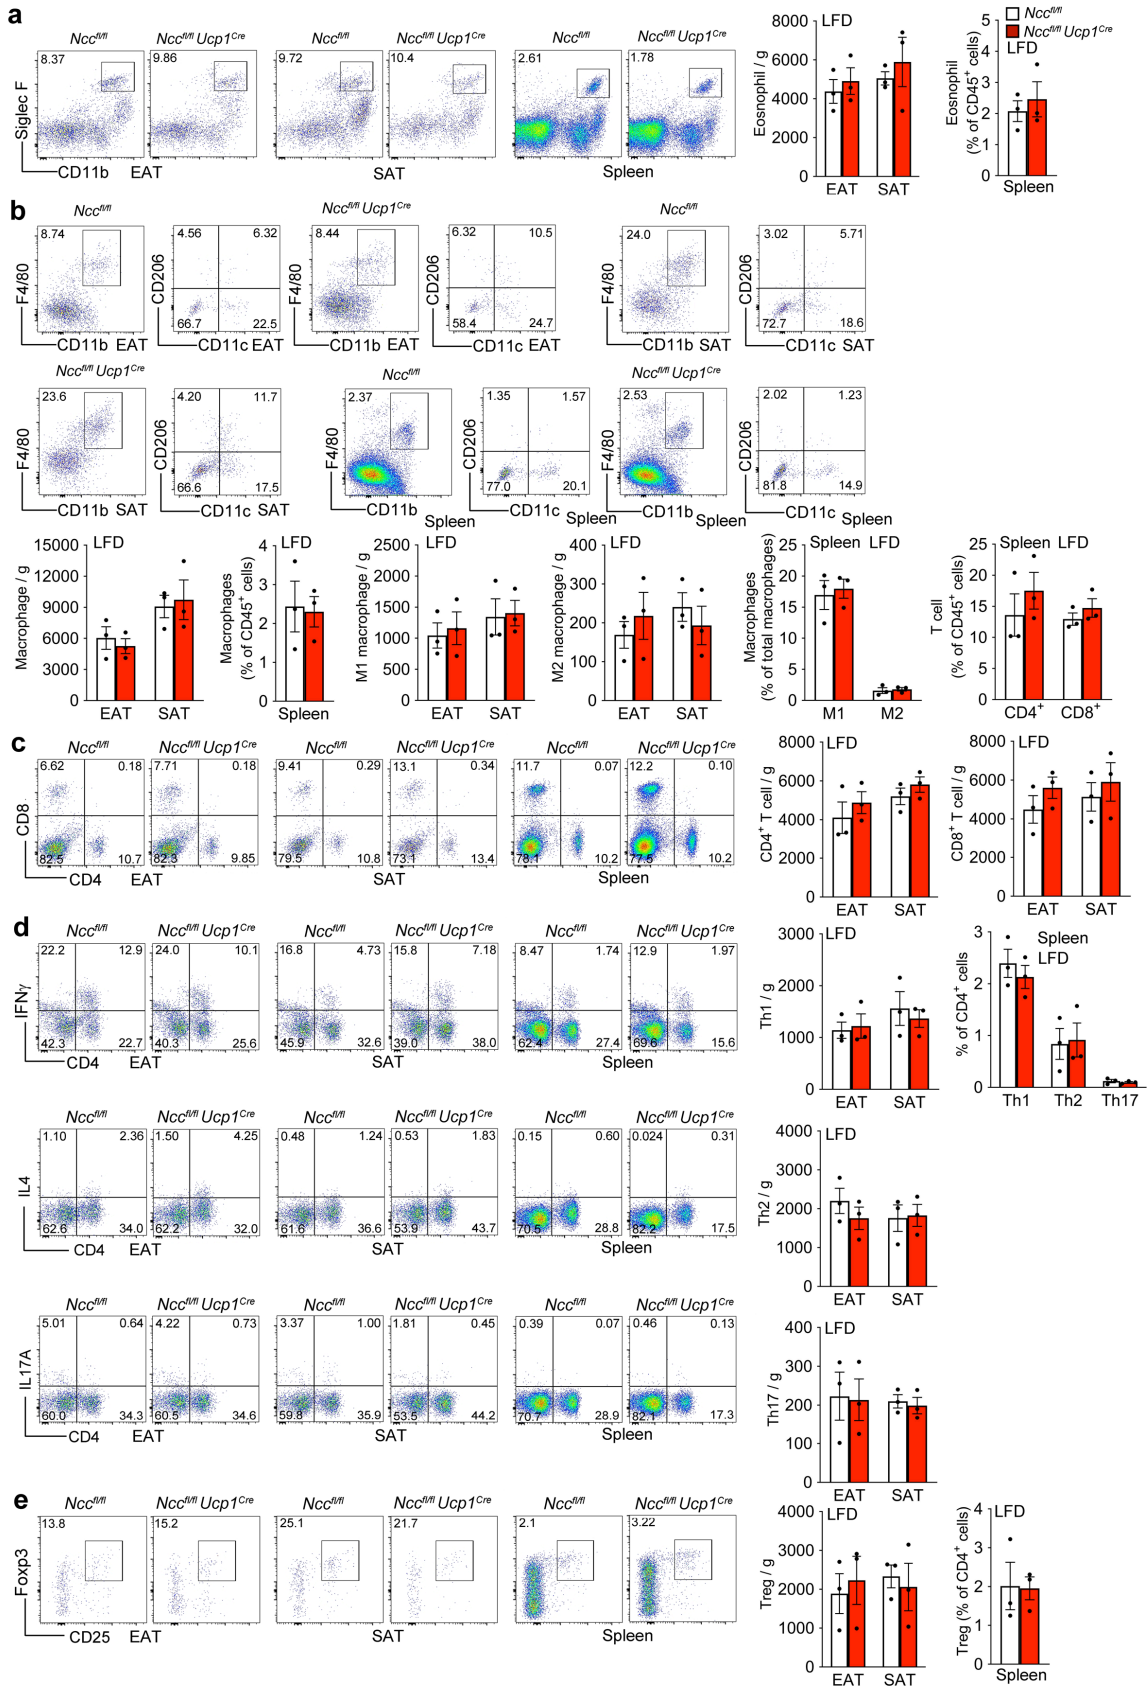

**Supplementary Fig. 9.** Quantification of eosinophils, macrophages, and different T cells in EAT, SAT, and spleens from LFD-fed *Ncc<sup>fl/fl</sup>* and *Ncc<sup>fl/fl</sup>Ucp1<sup>Cre</sup>* mice. **a-b.** Representative FACS images and quantification of CD11b<sup>+</sup>Siglec-F<sup>+</sup> eosinophils (**a**) and CD11b<sup>+</sup>F4/80<sup>+</sup> total macrophages, CD11b<sup>+</sup>F4/80<sup>+</sup>CD11c<sup>+</sup> M1 macrophages, and CD11b<sup>+</sup>F4/80<sup>+</sup>CD206<sup>+</sup> M2 macrophages in EAT, SAT, and BAT (**b**) from indicated mice. **c-e.** Representative FACS images and quantification of total CD4<sup>+</sup> and CD8<sup>+</sup> T cells (**c**) and CD4<sup>+</sup>IFN $\gamma$ <sup>+</sup> Th1, CD4<sup>+</sup>IL4<sup>+</sup> Th2, CD4<sup>+</sup>IL17A<sup>+</sup> Th17 T cells (**d**), and CD4<sup>+</sup>CD25<sup>+</sup>Foxp3<sup>+</sup> Treg (**e**) in EAT, SAT, and BAT from indicated mice. n=3 biologically independent samples per group. Data are mean $\pm$ SEM. Two-sided Mann-Whitney *U* test.

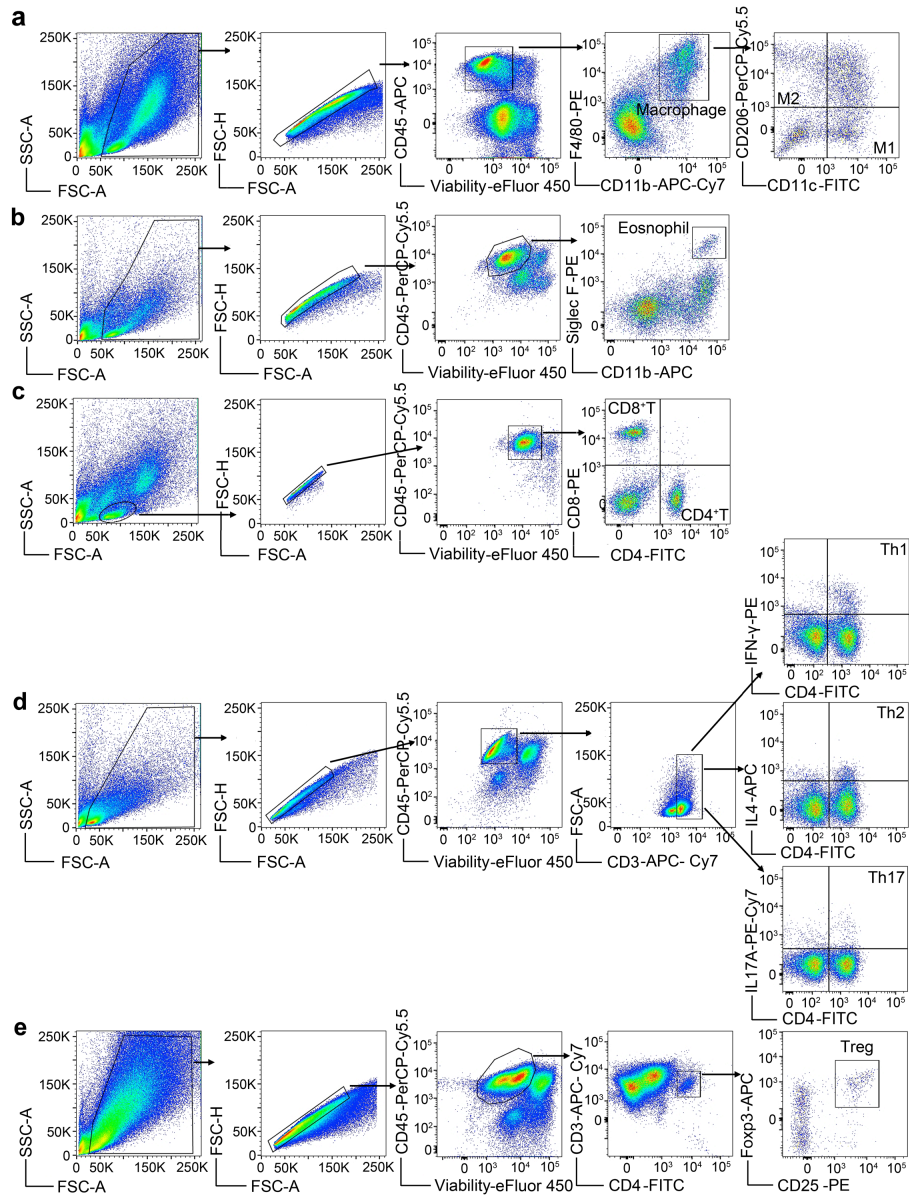

**Supplementary Fig. 10.** Gating strategies used for flow cytometry. **a.** Gating strategy to detect adipose tissue total ( $CD45^+CD11b^+F4/80^+$ ), M1 ( $CD45^+CD11b^+F4/80^+CD11c^+CD206^-$ ), and M2 ( $CD45^+CD11b^+F4/80^+CD11c^-CD206^+$ ) macrophages. **b.** Gating strategy to detect adipose tissue eosinophils ( $CD45^+CD11b^+Siglec-F^+$ ). **c.** Gating strategy to detect adipose tissue  $CD8^+$  ( $CD45^+CD8^+CD4^-$ ) and  $CD4^+$  ( $CD45^+CD8^-CD4^+$ ) T cells. **d.** Gating strategy to detect adipose tissue Th1 ( $CD45^+CD3^+CD4^+IFN-\gamma^+$ ), Th2 ( $CD45^+CD3^+CD4^+IL4^+$ ), and Th17 ( $CD45^+CD3^+CD4^+IL17A^+$ ) cells. **e.** Gating strategy to detect adipose tissue and splenic Treg ( $CD45^+CD3^+CD4^+CD25^+Foxp3^+$ ) cells.

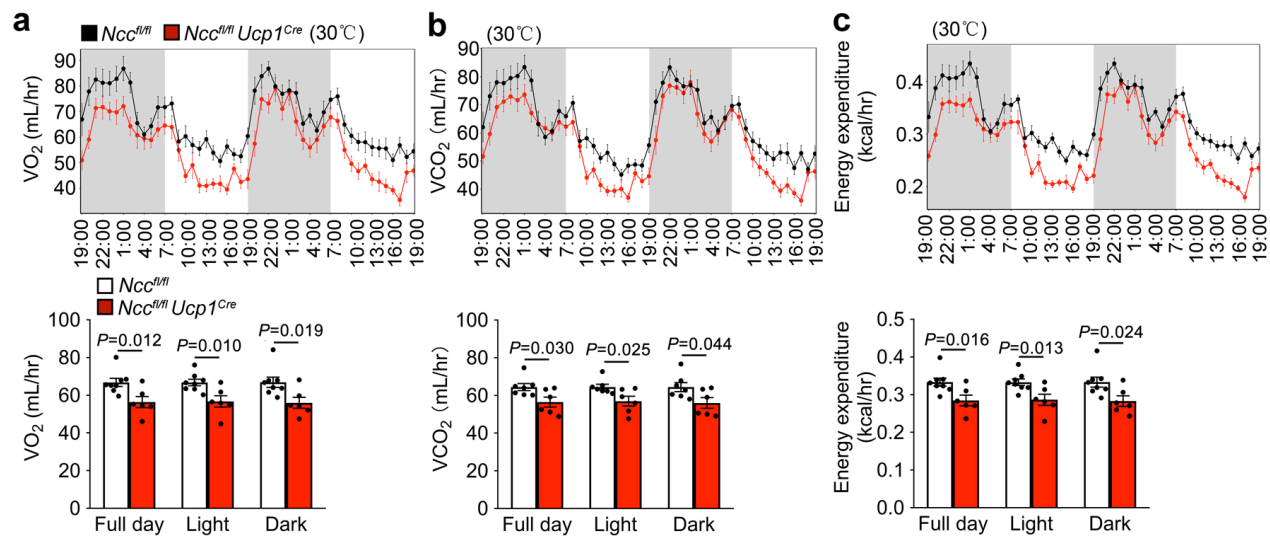

**Supplementary Fig. 11.** Energy expenditure in LFD-fed mice that were housed at a thermoneutral temperature (30 °C) for 7 days. **a-c.** Mouse metabolic parameters, including oxygen consumption ( $VO_2$ ) (**a**) and carbon dioxide production ( $VCO_2$ ) (**b**), and energy expenditure (**c**) and their average values from full day cycle, light cycle, and dark cycle during 48 hrs of monitoring in LFD-fed in *Ncc<sup>fl/fl</sup>* and *Ncc<sup>fl/fl</sup> Ucp1<sup>Cre</sup>* mice (*Ncc<sup>fl/fl</sup>*: n=8; *Ncc<sup>fl/fl</sup> Ucp1<sup>Cre</sup>*: n=6 biologically independent animals). Data are mean $\pm$ SEM, two-sided Student's t-test.

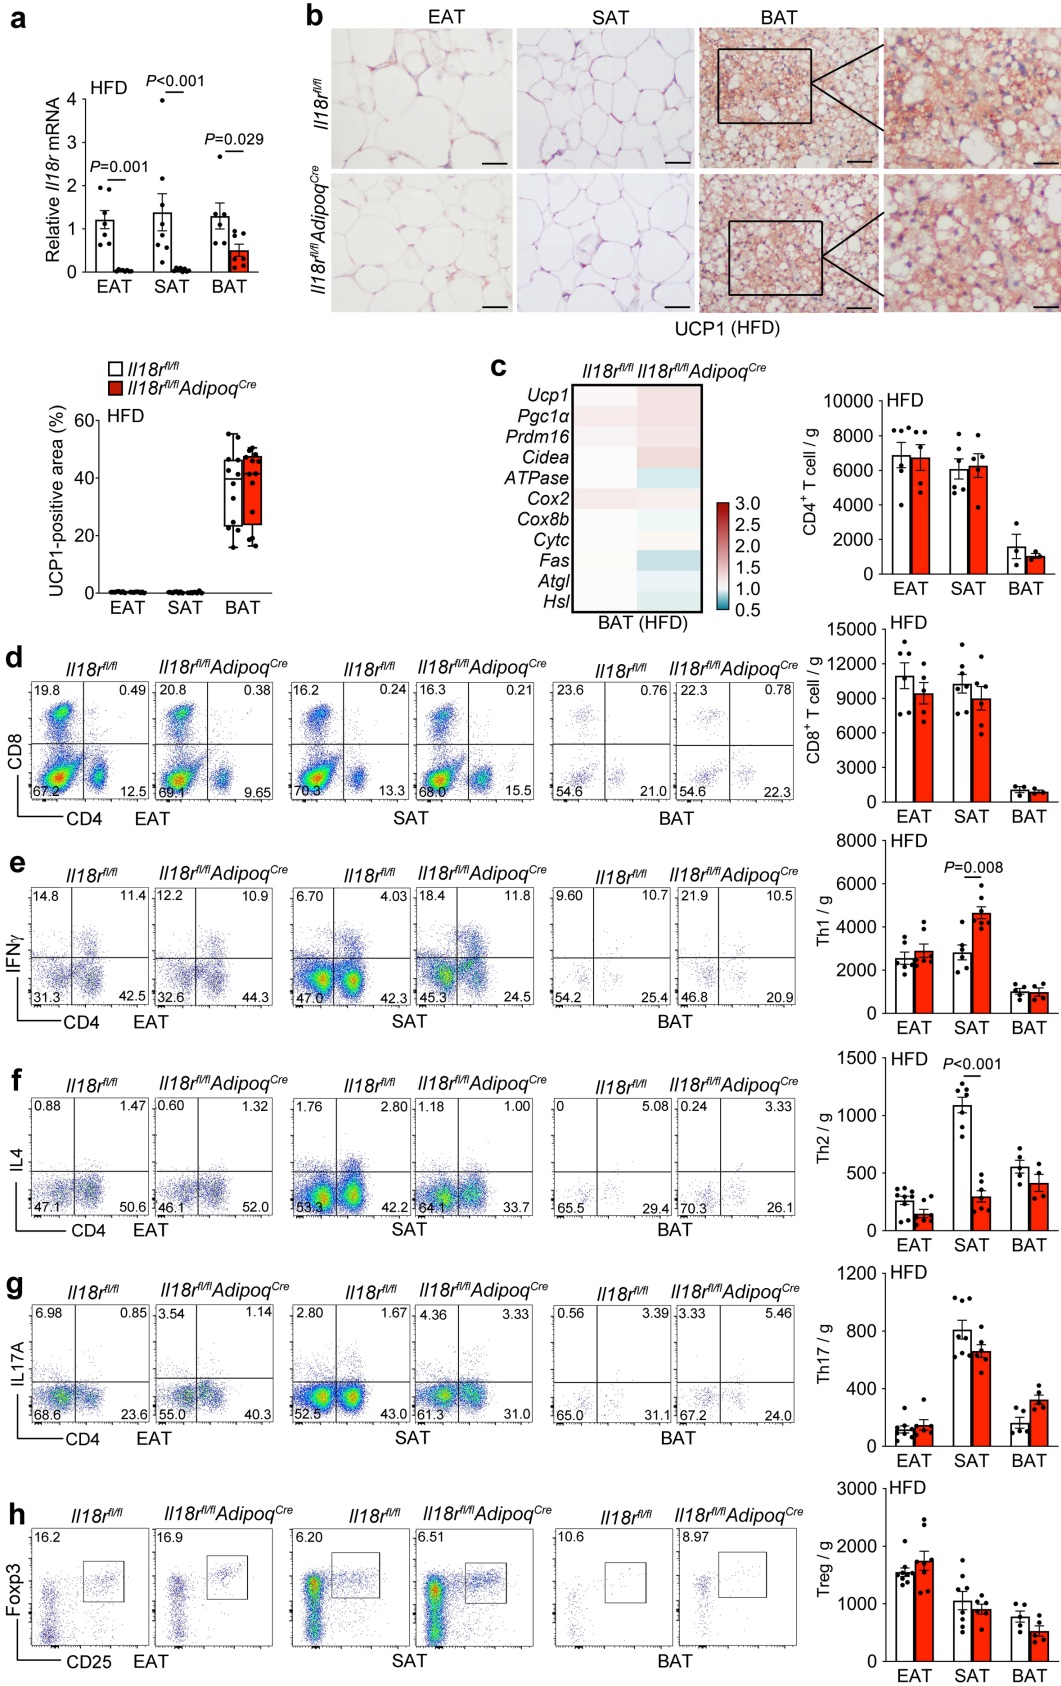

**Supplementary Fig. 12.** IL18r expression, UCP1 immunostaining, thermogenic gene expression, and different T-cell numbers in *Il18r<sup>fl/fl</sup>* and *Il18r<sup>fl/fl</sup>Adipoq<sup>Cre</sup>* mice after 12 weeks of a HFD. **a.** RT-PCR analysis of IL18r expression in EAT, SAT, and BAT from *Il18r<sup>fl/fl</sup>* and *Il18r<sup>fl/fl</sup>Adipoq<sup>Cre</sup>* mice (n=6 biologically independent samples per group). **b.** Immunostaining and quantification of UCP1-positive area in EAT, SAT, and BAT (*Il18r<sup>fl/fl</sup>*-EAT: n=8; *Il18r<sup>fl/fl</sup>Adipoq<sup>Cre</sup>*-EAT: n=9; *Il18r<sup>fl/fl</sup>*-SAT: n=8; *Il18r<sup>fl/fl</sup>Adipoq<sup>Cre</sup>*-SAT: n=7; *Il18r<sup>fl/fl</sup>*-BAT: n=12; *Il18r<sup>fl/fl</sup>Adipoq<sup>Cre</sup>*-BAT: n=13 biologically independent samples). Scale: 50  $\mu$ m, inset: 25  $\mu$ m. **c.** RT-PCR analyses of thermogenic genes in BAT from *Il18r<sup>fl/fl</sup>* and *Il18r<sup>fl/fl</sup>Adipoq<sup>Cre</sup>* mice (n=6 biologically independent samples per group). **d-h.** Representative FACS images and quantification of total CD4<sup>+</sup> and CD8<sup>+</sup> T cells (*Il18r<sup>fl/fl</sup>*-EAT: n=6; *Il18r<sup>fl/fl</sup>Adipoq<sup>Cre</sup>*-EAT: n=5; *Il18r<sup>fl/fl</sup>*-SAT: n=6; *Il18r<sup>fl/fl</sup>Adipoq<sup>Cre</sup>*-SAT: n=5; *Il18r<sup>fl/fl</sup>*-BAT: n=3; *Il18r<sup>fl/fl</sup>Adipoq<sup>Cre</sup>*-BAT: n=3 biologically independent samples) (**d**) and CD4<sup>+</sup>IFN $\gamma$ <sup>+</sup> Th1, CD4<sup>+</sup>IL4<sup>+</sup> Th2, CD4<sup>+</sup>IL17A<sup>+</sup> Th17 (*Il18r<sup>fl/fl</sup>*-EAT: n=6; *Il18r<sup>fl/fl</sup>Adipoq<sup>Cre</sup>*-EAT: n=7; *Il18r<sup>fl/fl</sup>*-SAT: n=6; *Il18r<sup>fl/fl</sup>Adipoq<sup>Cre</sup>*-SAT: n=7; *Il18r<sup>fl/fl</sup>*-BAT: n=5; *Il18r<sup>fl/fl</sup>Adipoq<sup>Cre</sup>*-BAT: n=5 biologically independent samples) (**e-g**), and CD4<sup>+</sup>CD25<sup>+</sup>Foxp3<sup>+</sup> Treg (*Il18r<sup>fl/fl</sup>*-EAT: n=8; *Il18r<sup>fl/fl</sup>Adipoq<sup>Cre</sup>*-EAT: n=6; *Il18r<sup>fl/fl</sup>*-SAT: n=8; *Il18r<sup>fl/fl</sup>Adipoq<sup>Cre</sup>*-SAT: n=7; *Il18r<sup>fl/fl</sup>*-BAT: n=5; *Il18r<sup>fl/fl</sup>Adipoq<sup>Cre</sup>*-BAT: n=5 biologically independent samples) (**h**) in EAT, SAT, and BAT from indicated mice. Data are mean $\pm$ SEM, two-sided Mann-Whitney *U* test.



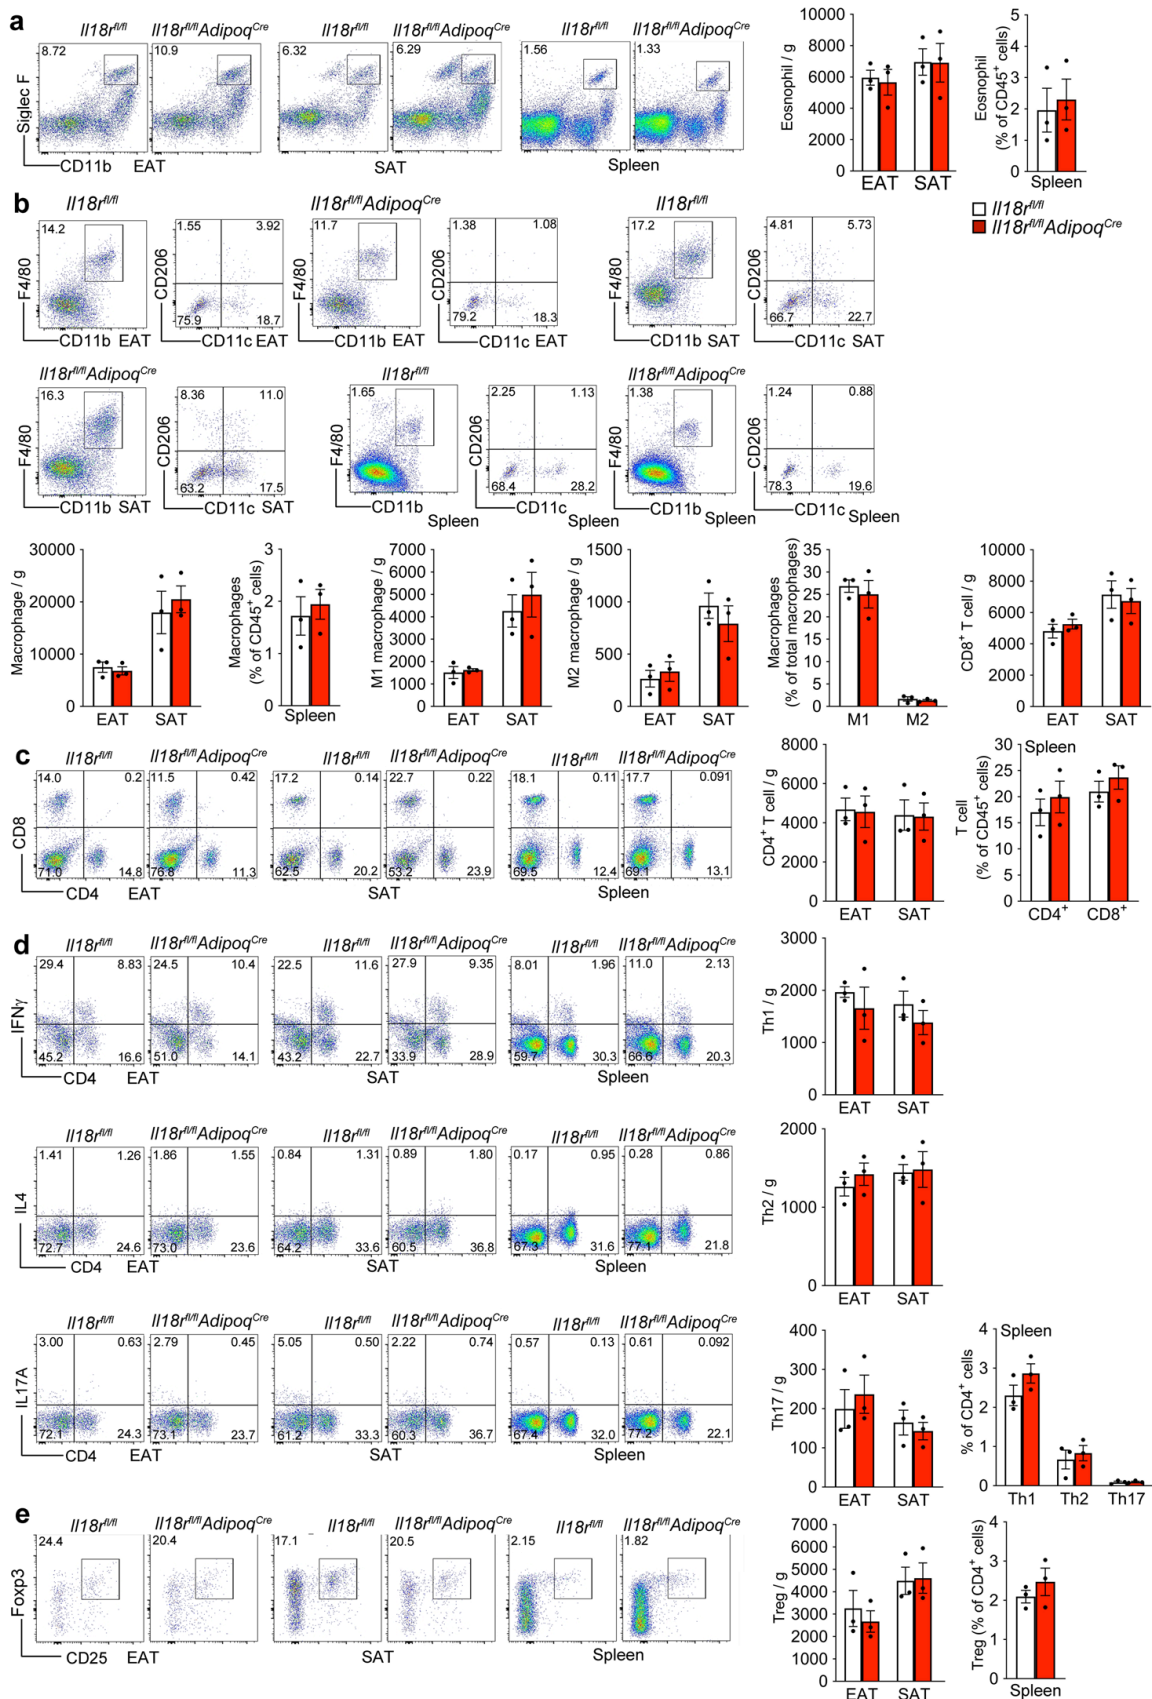

**Supplementary Fig. 13.** FACS analyses of eosinophils, macrophages, and different T cells in EAT, SAT, and spleens from LFD-fed *Il18<sup>fl/fl</sup>* and *Il18<sup>fl/fl</sup> Adipoq<sup>Cre</sup>* mice. **a-b.** Representative FACS images and quantification of CD11b<sup>+</sup>Siglec-F<sup>+</sup> eosinophils (**a**) and CD11b<sup>+</sup>F4/80<sup>+</sup> total macrophages, CD11b<sup>+</sup>F4/80<sup>+</sup>CD11c<sup>+</sup> M1 macrophages, and CD11b<sup>+</sup>F4/80<sup>+</sup>CD206<sup>+</sup> M2 macrophages in EAT, SAT, and spleens (**b**) from indicated mice. **c-e.** Representative FACS images and quantification of total CD4<sup>+</sup> and CD8<sup>+</sup> T cells (**c**), CD4<sup>+</sup>IFN $\gamma$ <sup>+</sup> Th1, CD4<sup>+</sup>IL4<sup>+</sup> Th2, CD4<sup>+</sup>IL17A<sup>+</sup> Th17 (**d**), and CD4<sup>+</sup>CD25<sup>+</sup>Foxp3<sup>+</sup> Treg (**e**) cells in EAT, SAT, and spleens from indicated mice. n=3 biologically independent per group. Data are mean $\pm$ SEM.



**Supplementary Table 1.** Antibodies dilutions and sources.

| <b>Antibodies</b>                      | <b>Dilutions, Applications</b> | <b>Catalog Numbers, Vendors</b>      |
|----------------------------------------|--------------------------------|--------------------------------------|
| Rabbit anti-IL18                       | 1:25, immunohistology          | ab207324, Abcam                      |
| Goat anti-IL18r                        | 1:20, immunohistology          | AF856, R&D Systems                   |
| Rabbit anti-NCC                        | 1:50, immunohistology          | AB3553, Millipore                    |
| Mouse anti-UCP1                        | 1:250, immunohistology         | MAB6158, R&D Systems                 |
| Rat anti-Mac-3                         | 1:200, immunohistology         | 108502, BioLegend                    |
| Biotin-conjugated secondary antibodies | 1:500, immunohistology         | Vector Laboratories                  |
| HRP-streptavidin                       | 1:500, immunohistology         | P039701-2, DAKO                      |
| Mouse anti-IR $\beta$ antibodies       | 1:50, immunohistology          | 3020S, Cell Signaling Tech           |
| Alex Fluor 555                         | 1:500, immunohistology         | Thermo Fisher Scientific             |
| Alex Fluor 488                         | 1:300, immunohistology         | Thermo Fisher Scientific             |
| Rabbit anti-IL18                       | 1:1000, immunoblot             | ab207324, Abcam                      |
| Goat anti-IL18r                        | 1:1000, immunoblot             | AF856, R&D Systems                   |
| Rabbit anti-NCC                        | 1:1000, immunoblot             | AB3553, Millipore                    |
| Mouse anti-UCP1                        | 1:1000, immunoblot             | MAB6158, R&D Systems                 |
| Rabbit anti-PGC1 $\alpha$              | 1:1000, immunoblot             | ab54481, Abcam                       |
| Rabbit anti-ATGL                       | 1:1000, immunoblot             | PA5-17436, Invitrogen                |
| Rabbit anti- $\beta$ 3-AR              | 1:1000, immunoblot             | PA5-117769, Thermo Fisher Scientific |
| Goat anti-GLUT4                        | 1:1000, immunoblot             | sc-1608, Santa Cruz Biotech          |
| Mouse anti-PPAR $\gamma$               | 1:1000, immunoblot             | sc-7273, Santa Cruz Biotech          |
| Rabbit anti-pAMPK                      | 1:1000, immunoblot             | 4185, Cell Signaling Tech            |
| Rabbit anti-AMPK                       | 1:1000, immunoblot             | 2532, Cell Signaling Tech            |
| Rabbit anti-pHSL                       | 1:1000, immunoblot             | 4139, Cell Signaling Tech            |
| Rabbit anti-HSL                        | 1:1000, immunoblot             | 4107, Cell Signaling Tech            |
| Rabbit anti-COX IV                     | 1:1000, immunoblot             | 4850, Cell Signaling Tech            |
| Rabbit anti-Cyt C                      | 1:1000, immunoblot             | 11940, Cell Signaling Tech           |
| Rabbit anti-pAKT                       | 1:1000, immunoblot             | 4060, Cell Signaling Tech            |
| Rabbit anti-AKT                        | 1:1000, immunoblot             | 9272, Cell Signaling Tech            |
| Rabbit anti-pIR $\beta$                | 1:1000, immunoblot             | 3026, Cell Signaling Tech            |
| Mouse anti-IR $\beta$                  | 1:1000, immunoblot             | 3020, Cell Signaling Tech            |
| Rabbit anti-pPKA                       | 1:1000, immunoblot             | 4781, Cell Signaling Tech            |
| Rabbit anti-PKA                        | 1:1000, immunoblot             | 4782, Cell Signaling Tech            |
| Rabbit anti-GAPDH                      | 1:1000, immunoblot             | 2118, Cell Signaling Tech            |
| Rabbit anti- $\beta$ -actin            | 1:1000, immunoblot             | 8457, Cell Signaling Tech            |

|                                     |                       |                          |
|-------------------------------------|-----------------------|--------------------------|
| HRP-conjugated secondary antibodies | 1:5000, immunoblot    | Thermo Fisher Scientific |
| Viability Dye eFluor 450            | 1:100, flow cytometry | 65-0863-14, eBioscience  |
| Anti-CD45-APC                       | 1:100, flow cytometry | 103112, BioLegend        |
| Anti-CD11b-APC-Cyanine7             | 1:100, flow cytometry | 101226, BioLegend        |
| Anti-F4/80-PE                       | 1:100, flow cytometry | 123110, BioLegend        |
| Anti-CD206-PerCP-Cyanine5.5         | 1:100, flow cytometry | 141716, BioLegend        |
| Anti-CD11c-FITC                     | 1:100, flow cytometry | 53-0114-82, eBioscience  |
| Anti-CD45-PerCP-Cyanine5.5          | 1:100, flow cytometry | 45-0451-82, Invitrogen   |
| Anti-CD11b-APC                      | 1:100, flow cytometry | 17-0112-83, eBioscience  |
| Anti-Siglec-F-PE                    | 1:100, flow cytometry | 12-1702-82, eBioscience  |
| Anti-CD4-FITC                       | 1:100, flow cytometry | 11-0042-85, eBiosciences |
| Anti-CD8-PE                         | 1:100, flow cytometry | 100708, BioLegend        |
| Anti-CD3-APC- Cyanine7              | 1:100, flow cytometry | 100222, BioLegend        |
| Anti-CD25-PE                        | 1:100, flow cytometry | 102008, BioLegend        |
| Anti-Foxp3-APC                      | 1:100, flow cytometry | 17-5773-82, eBioscience  |
| Anti-IFN- $\gamma$ -PE              | 1:100, flow cytometry | 12-7311-82, eBioscience  |
| Anti-IL4-APC                        | 1:100, flow cytometry | 17-7041-82, eBioscience  |
| Anti-IL17A-PE-Cyanine7              | 1:100, flow cytometry | 506922, BioLegend        |

---

**Supplementary Table 2.** Real-time PCR primer sequences.

| <b>Gene</b>     | <b>Forward primers (5' to 3')</b> | <b>Reverse primers (5' to 3')</b> |
|-----------------|-----------------------------------|-----------------------------------|
| <i>Ucp1</i>     | CACTCAGGATTGGCCTCTACG             | GGGGTTTGATCCCATGCAGA              |
| <i>Prdm16</i>   | CCACCAGACTTCGAGCTACG              | ACACCTCTGTATCCGTCAGCA             |
| <i>Pgc1α</i>    | CCCTGCCATTGTTAAGACC               | TGCTGCTGTTCTGTTTTTC               |
| <i>Elovl3</i>   | TTCTCACGCGGGTTAAAAATGG            | GAGCAACAGATAGACGACCAC             |
| <i>Tmem26</i>   | ACCCTGTCATCCCACAGAG               | TGTTTGGTGGAGTCCTAAGGTC            |
| <i>CD137</i>    | CGTGCAGAACTCCTGTGATAAC            | GTCCACCTATGCTGGAGAAGG             |
| <i>Cited1</i>   | ACTAGCTCCTCTGGATCGACA             | GACCCAGTTTTGCATGGGC               |
| <i>Pdgfra</i>   | AGCAGGCAGGGCTTCAACGG              | ACACAGTCTGGCGTGCGTCC              |
| <i>Ap2</i>      | ACACCGAGATTTCTTCA AACTG           | CCATCTAGGGTTATGATGCTCTTCA         |
| <i>Pparγ</i>    | TTGTAGAGTGCCAGGTGCTG              | CCTCCATAGCTCAGGTGGAA              |
| <i>Fas</i>      | AAGTCCCAGAAATCGCCTATG             | GGTATGGTTTTACGACTGGAG             |
| <i>Srebp1c</i>  | ATGCCATGGGCAAGTACACA              | ATAGCATCTCCTGCGCACTC              |
| <i>Acc1</i>     | TGTCCACCCAAGCATTCTTC              | CATCCAACACCAGTTCAGTATACGT         |
| <i>Acc2</i>     | ACTTTGACCTGACCGCTGTG              | CTGAGTGCCGGATAATGGC               |
| <i>Atgl</i>     | GGATGAAAGAGCAGACGGGTAG            | CGCAAGACAGTGGCACAGAG              |
| <i>Hsl</i>      | ACTGAGATTGAGGTGCTGTC              | AGGTGAGATGGTAACTGTGAG             |
| <i>Insr</i>     | CTACAGTGTTCGAGTCCGGG              | TGGCAATATTTGATGGGACATCT           |
| <i>Glut4</i>    | CTATTCAACCAGCATCTTCGAG            | CTACTAAGAGCACCAGAGACC             |
| <i>Glut1</i>    | GACGGGCCGCCTCATGTTGG              | GCTCTCCGTAGCGGTGGTTCC             |
| <i>IL18</i>     | CAGGCCTGACATCTTCTGCAA             | CTGACATGGCAGCCATTGT               |
| <i>Ncc</i>      | CTTCGGCCACTGGCATTCTG              | GATGGCAAGGTAGGAGATGG              |
| <i>Il18r</i>    | TTAGGACCAAAGTGT-GAGAAGG           | TCTCGTCTCTTT-CCGCTATGCG           |
| <i>IL6</i>      | CCTTCTACCCCAATTTCCAA              | AGATGAATTGGATGGTCTTGGTC           |
| <i>Mcp1</i>     | TAAAAACCTGGATCGGAACCAA            | GCATTAGCTTCAGATTTACGGGT           |
| <i>Tnfa</i>     | CAAAGGGAGAGTGGTCAGGT              | GGCAACAAGGTAGAGAGGC               |
| <i>IL1β</i>     | TGAAATGCCACCTTTTGACAG             | CCACAGCCACAATGAGTGATAC            |
| <i>Arg1</i>     | CTCCAAGCCAAAGTCCTTAGAG            | AGGAGCTGTCATTAGGGACATC            |
| <i>Mrc1</i>     | TGATTACGAGCAGTGGAAGC              | GTTACCCGTAAGCCCAATTT              |
| <i>Clec10a</i>  | CTCTGGAGAGCACAGTGGAG              | ACTTCCGAGCCGTTGTTCT               |
| <i>Siglec-F</i> | CTGGCTACGGACGGTTATTCCG            | GGAATTGGGGTACTGGACTTG             |
| <i>IL4</i>      | GGTCTCAACCCCAAGCTAGT              | GCCGATGATCTCTCTCAAGTGAT           |
| <i>IL13</i>     | CCTGGCTCTTGCTTGCTT                | GGTCTTGTGTGATGTTGCTCA             |
| <i>ATPase</i>   | CACCACCAAGAAGGGATCGA              | GCAGGGTCAGTCAGGTCATCA             |

|                 |                         |                          |
|-----------------|-------------------------|--------------------------|
| <i>Cox2</i>     | TCTCCCCTCTCTACGCATTCT   | TCATTGGTGCCCTATGGTTT     |
| <i>Cox8b</i>    | TGCGAAGTTCACAGTGGTTC    | ATGCTGCGGAGCTCTTTTTA     |
| <i>Cytc</i>     | GGCTGCTGGATTCTCTTACACA  | CCAAATACTCCATCAGGGTATCCT |
| <i>18s rRNA</i> | TCATAAGCTTGCGTTGATTA    | TAGTCAAGTTCGACCGTCTT     |
| <i>16s rRNA</i> | ACATCCCAATGGTGTAGAAG    | AAGTTGAGAGCGCTTATTTG     |
| <i>Pten</i>     | TGGATTCGACTTAGACTTGACCT | GCGGTGTCATAATGTCTCTCAG   |
| <i>Stat6</i>    | ACCTGTCCATTCGCTCACTG    | ATCTGGGGCTCTGGAGTAGG     |
| <i>Pdpr</i>     | ACCGTGCCAGTGTTGTTCTG    | AGCACCTGTGGTTGTTATTTTGT  |
| <i>Zbtb16</i>   | CTGGGACTTTGTGCGATGTG    | CGGTGGAAGAGGATCTCAAACA   |
| <i>GAPDH</i>    | TGTCATACTTGGCAGGTTTCT   | CGTGTTCTACCCCCAATGT      |

---

**Supplementary Table 3.** Human donor information for Fig. 5o.

| <b>Donor number</b> | <b>Procedure</b> | <b>Age</b> | <b>Gender</b> | <b>BMI</b> | <b>Diabetic</b> | <b>Tissue</b> | <b>Source</b>                |
|---------------------|------------------|------------|---------------|------------|-----------------|---------------|------------------------------|
| 1                   | Panniculectomy   | 49         | Male          | 32.5       | No              | Abdomen       | Brigham and Women's Hospital |
| 2                   | Abdominoplasty   | 50         | Female        | 21.3       | No              | Abdomen       | Brigham and Women's Hospital |
